## Efficacy of neuromuscular electro stimulation on muscle strength in elderly patients with diabetes mellitus underwent cardiovascular surgery – a multicenter randomized controlled trial

K. Takino<sup>1</sup>, M. Kameshima<sup>2</sup>, C. Asai<sup>3</sup>, I. Kawamura<sup>4</sup>, S. Tomita<sup>5</sup>, A. Hirakawa<sup>6</sup>, S. Yamada<sup>7</sup>

<sup>1</sup>Nagoya University Graduate School of Medicine, Program in Physical and Occupational Therapy, Nagoya, Japan; <sup>2</sup>Nagoya Heart Center, Department of cardiac rehabilitation, Nagoya, Japan; <sup>3</sup>Toyohashi Heart Center, Department of cardiac rehabilitation, Toyohashi, Japan; <sup>4</sup>Gifu Heart Center, Department of cardiology, Gifu, Japan; <sup>5</sup>Gifu Heart Center, Department of cardiovascular surgery, Gifu, Japan; <sup>6</sup>University of Tokyo, Department of Biostatistics and Bioinformatics, Tokyo, Japan; <sup>7</sup>Nagoya University Graduate School of Medicine, Department of Health Sciences, Nagoya, Japan

**Funding Acknowledgement:** Type of funding source: None

**Introduction:** Cardiovascular surgery causes muscle weakness probably due to a postoperative increase in inflammatory cytokine production, and diabetes mellitus (DM) may promote the postoperative muscle weakness because of increased insulin resistance.

**Purpose:** A multicenter randomized controlled trial was conducted to examine the effects of postoperative neuromuscular electrical stimulation (NMES) on muscle strength for elderly patients with DM after cardiovascular surgery (UMIN000029940).

**Methods:** Patients underwent cardiovascular surgery were consecutive screened for eligibility (With DM and age  $\geq 65$  years) as study subjects. If eligible, patients were randomly assigned either to the NMES or the sham group. Both of group underwent NMES or sham stimulation (60 minutes / 5 times) and usual postoperative early mobilization program until postoperative day (POD) 7. The primary outcome was the percent change in knee extensor isometric muscle strength (% $\Delta$ KEIS) between preoperative to POD

7. Secondary outcomes were the percent change in usual (% $\Delta$ Usual walking speed) and maximum walking speed (% $\Delta$ Maximum walking speed) and grip strength (% $\Delta$ GS). Assessors for physical function were blinded to the outcomes. The statistician who was blinded to the allocation analyzed the data using preoperative value adjusted ANCOVA.

**Results:** Of 1151 consecutive patients screened for eligibility from February 2018 to January 2020, 158 participants (NMES group, n=79; sham group, n=79) were enrolled. NMES group demonstrated significantly lower % $\Delta$ KEIS compared with those in the sham group (Table). Among secondary outcomes, NMES group showed significantly lower % $\Delta$ Maximum walking speed and tendency of lower % $\Delta$ Usual walking speed and % $\Delta$ GS (Table).

**Conclusion:** NMES prevented postoperative muscle weakness in the elderly patients with DM, indicating that NMES along with early mobilization could be implicated as specific intervention to those populations.

Table 1. Estimates of effect in primary and secondary outcomes in NMES and sham group

| Outcome                         | N   | NMES group (n=79) |               | Sham group (n=79) |                | P      |
|---------------------------------|-----|-------------------|---------------|-------------------|----------------|--------|
|                                 |     | Adjusted Means    | 95% CI        | Adjusted Means    | 95% CI         |        |
| % $\Delta$ KEIS                 | 158 | -2.3              | -5.7 to 1.1   | -13.7             | -17.1 to -10.3 | <.0001 |
| % $\Delta$ Usual Waking Speed   | 158 | -12.4             | -16.3 to -8.5 | -17.4             | -21.3 to -13.5 | 0.078  |
| % $\Delta$ Maximum Waking Speed | 156 | -12.9             | -17.1 to -8.7 | -20.1             | -24.2 to -16.0 | 0.016  |
| % $\Delta$ GS                   | 158 | -8.3              | -11.1 to -5.6 | -12.1             | -14.8 to -9.3  | 0.06   |

Adjusted for preoperative value. Abbreviations: The percent change in knee extensor isometric strength (%  $\Delta$ KEIS), usual waking speed (%  $\Delta$ Usual Waking Speed) and maximum waking speed (%  $\Delta$ Maximum Waking Speed), grip strength (%  $\Delta$ GS) from preoperative to postoperative day 7.
